# Supplementary material for: Structures of six photochromic 3d complexes containing 3,3′-azobis-1,2,4-triazole ligand
Source: Royal Society of Chemistry journal article supplement (doi:10.1039/c3ce40736e), 2013-01-01
Supplement: c3ce40736e.pdf [file c3ce40736e.pdf]

**Table S1.** Selected bond lengths (Å) and angles (°) for **1**

|                   |            |                   |            |
|-------------------|------------|-------------------|------------|
| N(1)-Mn(1)        | 2.201(4)   | N(18)-Mn(1)       | 2.287(3)   |
| N(19)-Mn(1)       | 2.279(3)   | N(20)-Mn(1)       | 2.268(4)   |
| O(2)-Mn(1)        | 2.157(4)   | N(17)-Mn(1)       | 2.259(3)   |
| N(6)-Mn(2)        | 2.229(4)   | N(21)-Mn(2)       | 2.242(3)   |
| N(22)-Mn(2)       | 2.249(4)   | N(24)-Mn(2)       | 2.250(3)   |
| O(1)-Mn(2)        | 2.212(3)   | N(23)-Mn(2)       | 2.236(3)   |
| N(1)-Mn(1)-N(18)  | 99.30(13)  | N(17)-Mn(1)-N(18) | 72.30(13)  |
| N(1)-Mn(1)-N(19)  | 91.08(13)  | N(17)-Mn(1)-N(19) | 96.78(13)  |
| N(1)-Mn(1)-N(20)  | 91.74(14)  | N(17)-Mn(1)-N(20) | 86.67(13)  |
| N(1)-Mn(1)-O(2)   | 95.38(14)  | N(17)-Mn(1)-O(2)  | 89.01(13)  |
| N(1)-Mn(1)-N(17)  | 171.04(15) | N(19)-Mn(1)-N(20) | 71.74(13)  |
| N(18)-Mn(1)-N(19) | 166.61(13) | N(19)-Mn(1)-O(2)  | 89.44(12)  |
| N(18)-Mn(1)-N(20) | 99.33(13)  | N(20)-Mn(1)-O(2)  | 160.01(13) |
| N(18)-Mn(1)-O(2)  | 97.92(12)  | N(6)-Mn(2)-N(21)  | 90.89(12)  |
| N(23)-Mn(2)-N(21) | 95.64(13)  | N(6)-Mn(2)-N(22)  | 90.66(14)  |
| N(23)-Mn(2)-N(22) | 89.48(13)  | N(6)-Mn(2)-N(24)  | 100.11(13) |
| N(23)-Mn(2)-N(24) | 73.14(13)  | N(6)-Mn(2)-O(1)   | 90.72(13)  |
| N(23)-Mn(2)-O(1)  | 90.08(12)  | N(6)-Mn(2)-N(23)  | 173.21(13) |
| N(22)-Mn(2)-N(24) | 96.71(13)  | N(21)-Mn(2)-N(22) | 72.94(13)  |
| N(22)-Mn(2)-O(1)  | 171.94(14) | N(21)-Mn(2)-N(24) | 165.08(13) |
| N(24)-Mn(2)-O(1)  | 90.87(13)  | N(21)-Mn(2)-O(1)  | 99.10(14)  |

**Table S2.** Selected bond lengths (Å) and angles (°) for **2**

|                           |            |                                         |            |
|---------------------------|------------|-----------------------------------------|------------|
| N(1)-Mn                   | 2.302(3)   | N(1) <sup>a</sup> -Mn                   | 2.302(3)   |
| O(1)-Mn                   | 2.145(3)   | O(1) <sup>a</sup> -Mn                   | 2.145(3)   |
| O(2)-Mn                   | 2.175(3)   | O(2) <sup>a</sup> -Mn                   | 2.175(3)   |
| N(1)-Mn-O(1)              | 90.9(1)    | N(1) <sup>a</sup> -Mn-O(1)              | 89.1(1)    |
| N(1)-Mn-O(1) <sup>a</sup> | 89.1(1)    | N(1) <sup>a</sup> -Mn-O(1) <sup>a</sup> | 90.9(1)    |
| N(1)-Mn-O(2)              | 90.72(9)   | N(1) <sup>a</sup> -Mn-O(2)              | 89.28(9)   |
| N(1)-Mn-O(2) <sup>a</sup> | 89.28(9)   | N(1) <sup>a</sup> -Mn-O(2) <sup>a</sup> | 90.72(9)   |
| N(1)-Mn-N(1) <sup>a</sup> | 180.000(1) | O(1) <sup>a</sup> -Mn-O(2)              | 90.23(11)  |
| O(1)-Mn-O(1) <sup>a</sup> | 180.000(1) | O(1) <sup>a</sup> -Mn-O(2) <sup>a</sup> | 89.77(11)  |
| O(1)-Mn-O(2)              | 89.77(11)  | O(2)-Mn-O(2) <sup>a</sup>               | 180.000(1) |
| O(1)-Mn-O(2) <sup>a</sup> | 90.23(11)  |                                         |            |

Symmetry code: <sup>a</sup>2-x, 1-y, 2-z

**Table S3.** Selected bond lengths (Å) and angles (°) for **3**

|         |          |                       |          |
|---------|----------|-----------------------|----------|
| N(1)-Co | 2.160(3) | N(1) <sup>a</sup> -Co | 2.160(3) |
|---------|----------|-----------------------|----------|

|                               |            |                                             |            |
|-------------------------------|------------|---------------------------------------------|------------|
| N(9)-Co                       | 2.095(3)   | N(9) <sup>a</sup> -Co                       | 2.095(3)   |
| N(10)-Co                      | 2.094(3)   | N(10) <sup>a</sup> -Co                      | 2.094(3)   |
| N(1)-Co(1)-N(9)               | 90.51(13)  | N(1) <sup>a</sup> -Co(1)-N(9)               | 90.62(14)  |
| N(1)-Co(1)-N(10)              | 89.03(13)  | N(1) <sup>a</sup> -Co(1)-N(10)              | 89.89(13)  |
| N(1)-Co(1)-N(9) <sup>a</sup>  | 90.62(13)  | N(1) <sup>a</sup> -Co(1)-N(9) <sup>a</sup>  | 90.51(13)  |
| N(1)-Co(1)-N(10) <sup>a</sup> | 89.89(13)  | N(1) <sup>a</sup> -Co(1)-N(10) <sup>a</sup> | 89.03(13)  |
| N(1)-Co(1)-N(1) <sup>a</sup>  | 178.33(19) | N(10)-Co(1)-N(9) <sup>a</sup>               | 177.88(14) |
| N(9)-Co(1)-N(10)              | 83.27(15)  | N(10)-Co(1)-N(10) <sup>a</sup>              | 98.8(2)    |
| N(9)-Co(1)-N(9) <sup>a</sup>  | 94.6(2)    | N(9) <sup>a</sup> -Co(1)-N(10) <sup>a</sup> | 83.27(15)  |
| N(9)-Co(1)-N(10) <sup>a</sup> | 177.88(14) |                                             |            |

Symmetry code: <sup>a</sup>1-x, y, 1.5-z

**Table S4.** Selected bond lengths (Å) and angles (°) for **4**

|                              |            |                               |            |
|------------------------------|------------|-------------------------------|------------|
| N(1)-Cd(1)                   | 2.475(2)   | N(5)-Cd(1)                    | 2.326(3)   |
| N(6)-Cd(1)                   | 2.301(3)   | N(7)-Cd(1)                    | 2.331(3)   |
| N(8)-Cd(1)                   | 2.309(3)   | N(1) <sup>a</sup> -Cd(1)      | 2.642(3)   |
| N(1)-Cd(1)-N(5)              | 110.15(9)  | N(1) <sup>a</sup> -Cd(1)-N(5) | 82.53(9)   |
| N(1)-Cd(1)-N(6)              | 90.65(9)   | N(1) <sup>a</sup> -Cd(1)-N(6) | 91.16(9)   |
| N(1)-Cd(1)-N(7)              | 86.95(9)   | N(1) <sup>a</sup> -Cd(1)-N(7) | 80.41(9)   |
| N(1)-Cd(1)-N(8)              | 89.10(9)   | N(1) <sup>a</sup> -Cd(1)-N(8) | 89.45(10)  |
| N(1)-Cd(1)-N(1) <sup>a</sup> | 167.28(8)  | N(6)-Cd(1)-N(7)               | 104.57(10) |
| N(5)-Cd(1)-N(6)              | 77.56(10)  | N(6)-Cd(1)-N(8)               | 178.33(10) |
| N(5)-Cd(1)-N(7)              | 162.83(10) | N(7)-Cd(1)-N(8)               | 77.06(10)  |
| N(5)-Cd(1)-N(8)              | 100.97(10) |                               |            |

Symmetry code: <sup>a</sup>1-x, -0.5+y, 0.5-z

**Table S5.** Selected bond lengths (Å) and angles (°) for **5**

|                              |              |                               |             |
|------------------------------|--------------|-------------------------------|-------------|
| N(1)-Zn(1)                   | 2.126(5)     | N(2)-Zn(1)                    | 2.107(5)    |
| N(3)-Zn(1)                   | 2.107(5)     | N(4)-Zn(1)                    | 2.130(5)    |
| N(8)-Zn(1)                   | 2.324(5)     | N(5) <sup>a</sup> -Zn(1)      | 2.622(5)    |
| N(8)-Zn(1)-N(1)              | 90.97(18)    | N(5) <sup>a</sup> -Zn(1)-N(1) | 95.237(191) |
| N(8)-Zn(1)-N(2)              | 95.81(18)    | N(5) <sup>a</sup> -Zn(1)-N(2) | 83.950(186) |
| N(8)-Zn(1)-N(3)              | 96.89(19)    | N(5) <sup>a</sup> -Zn(1)-N(3) | 83.614(190) |
| N(8)-Zn(1)-N(4)              | 88.39(9)     | N(5) <sup>a</sup> -Zn(1)-N(4) | 85.458(190) |
| N(8)-Zn(1)-N(5) <sup>a</sup> | 173.680(176) | N(2)-Zn(1)-N(3)               | 167.2(2)    |
| N(1)-Zn(1)-N(2)              | 81.7(2)      | N(2)-Zn(1)-N(4)               | 99.59(19)   |
| N(1)-Zn(1)-N(3)              | 96.4(2)      | N(3)-Zn(1)-N(4)               | 82.5(2)     |
| N(1)-Zn(1)-N(4)              | 178.60(19)   |                               |             |

Symmetry code: <sup>a</sup>2-x, 0.5+y, 0.5-z

**Table S6.** Selected bond lengths (Å) and angles (°) for **6**

|                              |            |                                            |            |
|------------------------------|------------|--------------------------------------------|------------|
| N(3)-Cu                      | 2.5853(26) | N(3) <sup>a</sup> -Cu                      | 2.5853(26) |
| N(9)-Cu                      | 1.998(2)   | N(9) <sup>a</sup> -Cu                      | 1.998(2)   |
| N(8)-Cu                      | 2.0281(19) | N(8) <sup>a</sup> -Cu                      | 2.0281(19) |
| N(3)-Cu(1)-N(9)              | 87.35(9)   | N(3) <sup>a</sup> -Cu(1)-N(9)              | 92.65(9)   |
| N(3)-Cu(1)-N(8)              | 92.713(80) | N(3) <sup>a</sup> -Cu(1)-N(8)              | 87.287(80) |
| N(3)-Cu(1)-N(9) <sup>a</sup> | 92.65(9)   | N(3) <sup>a</sup> -Cu(1)-N(9) <sup>a</sup> | 87.35(9)   |
| N(3)-Cu(1)-N(8) <sup>a</sup> | 87.287(80) | N(3) <sup>a</sup> -Cu(1)-N(8) <sup>a</sup> | 92.713(80) |
| N(3)-Cu(1)-N(3) <sup>a</sup> | 180.000    | N(8)-Cu(1)-N(9) <sup>a</sup>               | 95.55(8)   |
| N(9)-Cu(1)-N(8)              | 84.45(8)   | N(8)-Cu(1)-N(8) <sup>a</sup>               | 180.0(1)   |
| N(9)-Cu(1)-N(9) <sup>a</sup> | 180.00(5)  | N(9) <sup>a</sup> -Cu(1)-N(8) <sup>a</sup> | 84.45(8)   |
| N(9)-Cu(1)-N(8) <sup>a</sup> | 95.55(8)   |                                            |            |

Symmetry code: <sup>a</sup> -x,-y,-z

**Table S7.** Relevant H-Bonds in complex

| D-H...A                                                              | D-H [Å] | H...A [Å] | D...A [Å]  | D-H...A [°] |
|----------------------------------------------------------------------|---------|-----------|------------|-------------|
| Relevant H-Bonds in complex 1                                        |         |           |            |             |
| O2-H6...O3                                                           | 0.80    | 1.937     | 2.7220(48) | 169         |
| C8a-H8a...O2b                                                        | 0.93    | 1.823     | 2.7121(43) | 159         |
| Symmetry codes: a 0.5 + x, 0.5 - y, -0.5 + z. b 0.5 + x, 0.5 + y, z. |         |           |            |             |
| Relevant H-Bonds in complex 2                                        |         |           |            |             |
| O1a-H3a...N3                                                         | 0.86    | 2.264     | 2.8452(43) | 125         |
| O3a-H7a...N2                                                         | 0.86    | 2.131     | 2.8466(39) | 150         |
| C1-H1...O3                                                           | 0.93    | 1.995     | 2.8551(34) | 162         |
| Symmetry codes: a x, y, -1+z.                                        |         |           |            |             |
| Relevant H-Bonds in complex 5                                        |         |           |            |             |
| C8-H8...O2                                                           | 0.93    | 1.976     | 2.9040(81) | 174         |
| O1-H20...O2e                                                         | 0.80    | 2.027     | 2.8520(76) | 173         |
| Symmetry codes: a x, 1.5 - y, 0.5 + z.                               |         |           |            |             |

**Table S8.** The results of interaction energies calculation of 1–6

| compound                   | 1              | 2              | 3              | 4              | 5              | 6              |
|----------------------------|----------------|----------------|----------------|----------------|----------------|----------------|
| E <sub>(AB)/u</sub>        | -1086.68224991 | -1182.53522111 | -1182.54256798 | -1182.56242568 | -1182.35105496 | -1182.53081402 |
| E <sub>(A,bAB)/u</sub>     | -591.465042458 | -591.272268109 | -591.276524220 | -591.286178601 | -591.180551884 | -591.267197939 |
| E <sub>(B,bAB)/u</sub>     | -495.226431581 | -591.272742304 | -591.274983639 | -591.282562596 | -591.177513328 | -591.266211344 |
| E <sub>(A)/u</sub>         | -591.461521953 | -591.268871250 | -591.278869794 | -591.278869976 | -591.156677105 | -591.268871239 |
| E <sub>(B)/u</sub>         | -495.233070856 | -591.268088953 | -591.278087934 | -591.27808839  | -591.170665937 | -591.268088779 |
| E <sub>(corrected)/u</sub> | -1086.67736867 | -1182.52117090 | -1182.53001785 | -1182.55444285 | -1182.34333278 | -1182.51586475 |
| E <sub>(BSSSE)/u</sub>     | 0.004881230205 | 0.014050209985 | 0.012550130569 | 0.007982831861 | 0.007722180401 | 0.014949265210 |

E(interaction energy) = E<sub>(corrected)</sub> - (E<sub>(A)</sub> + E<sub>(B)</sub>) = E<sub>(AB)</sub> - (E<sub>(A,bAB)</sub> + E<sub>(B,bAB)</sub>)

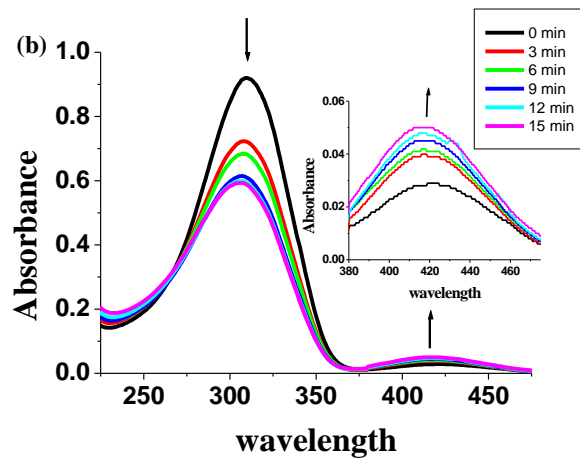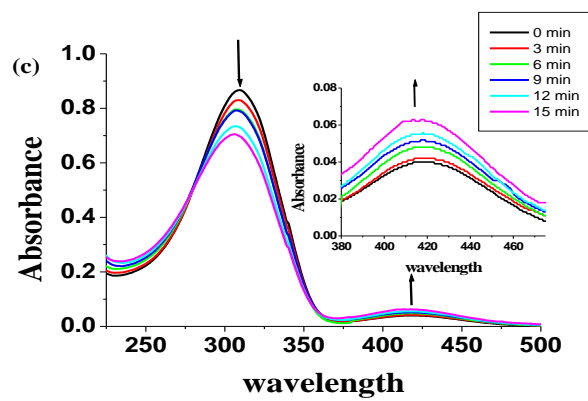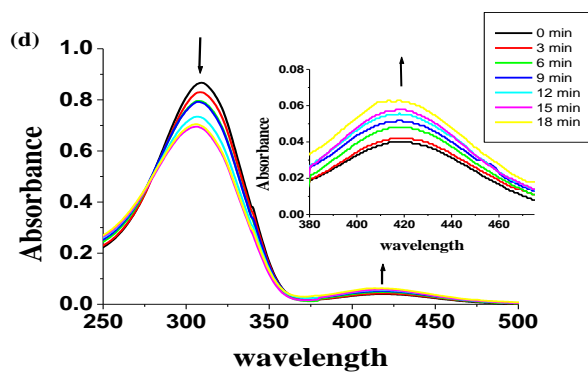

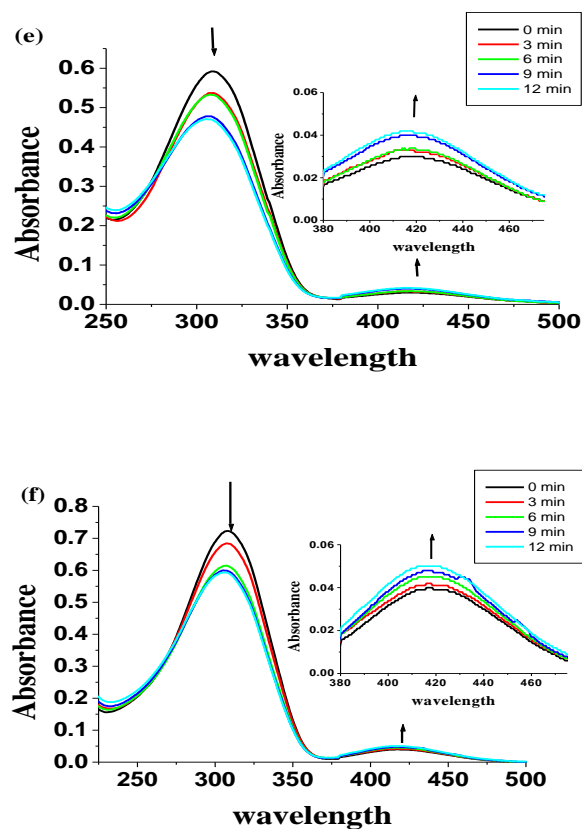

**Figure S1.** (b)–(e) UV-vis spectral change of 2–6 in aqueous solution with the concentration of  $6.0 \times 10^{-5} \text{ mol} \cdot \text{L}^{-1}$  upon repeated irradiation at 310 nm at 3 min interval at room temperature.

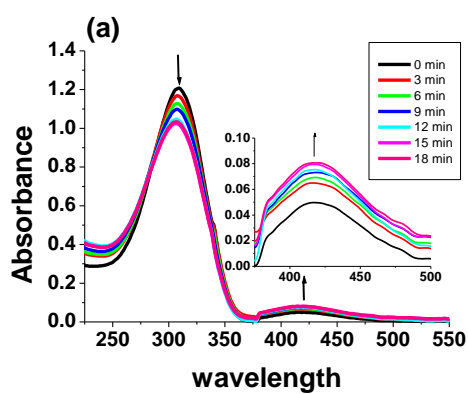

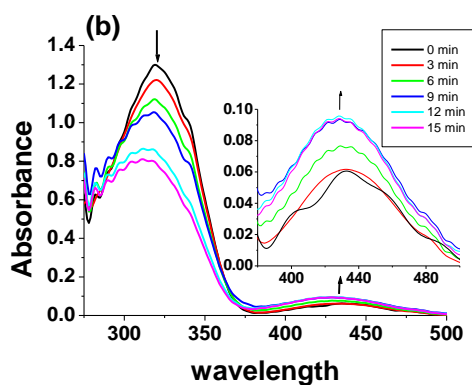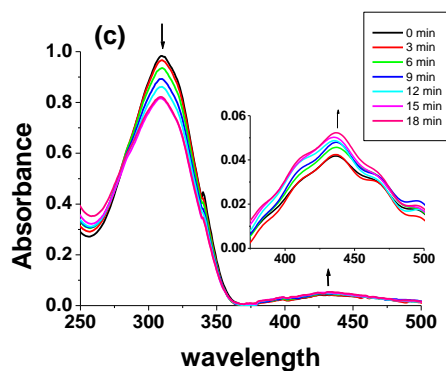

**Figure S2.** (a)–(c) UV-vis spectral changes in solution of water, DMF and ethanol with the concentration of  $1 \times 10^{-4} \text{ mol} \cdot \text{L}^{-1}$  upon repeated irradiation at 310 nm at 3 min interval at room temperature, respectively.

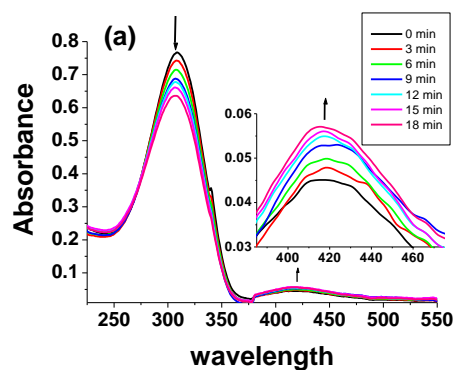

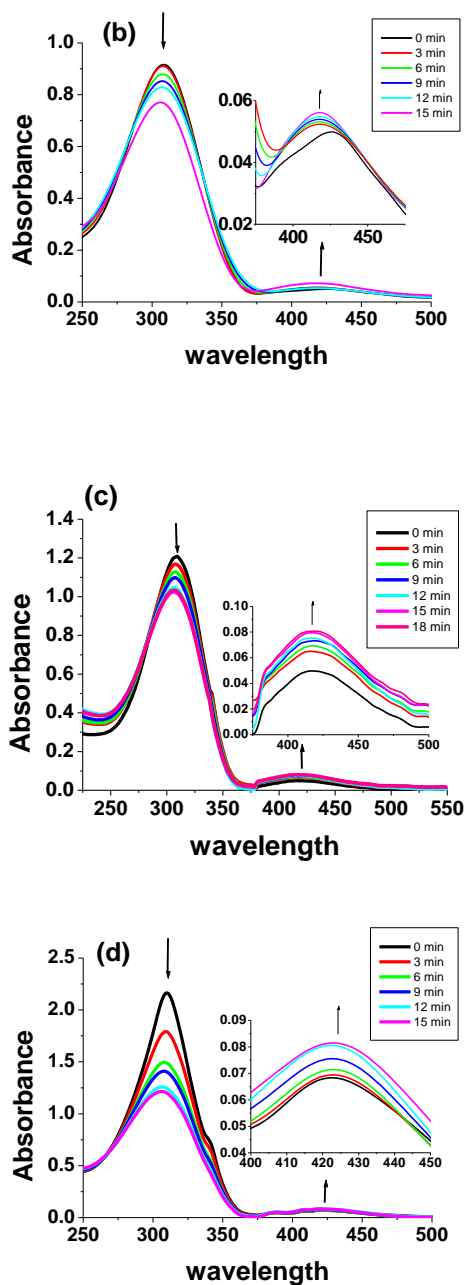

**Figure S3.** (a)–(d) UV-vis spectral changes in aqueous solution with the concentration of  $2 \times 10^{-5}$ ,  $5 \times 10^{-5}$ ,  $1 \times 10^{-4}$ ,  $5 \times 10^{-4} \text{ mol} \cdot \text{L}^{-1}$  upon repeated irradiation at 310 nm at 3 min interval at room temperature, respectively.
